# Supplementary material
Source: Springer Nature journal article supplement (https://www.springermedizin.de/resource/supplementary/13063_2010_614_MOESM3_ESM.pdf/9618872)

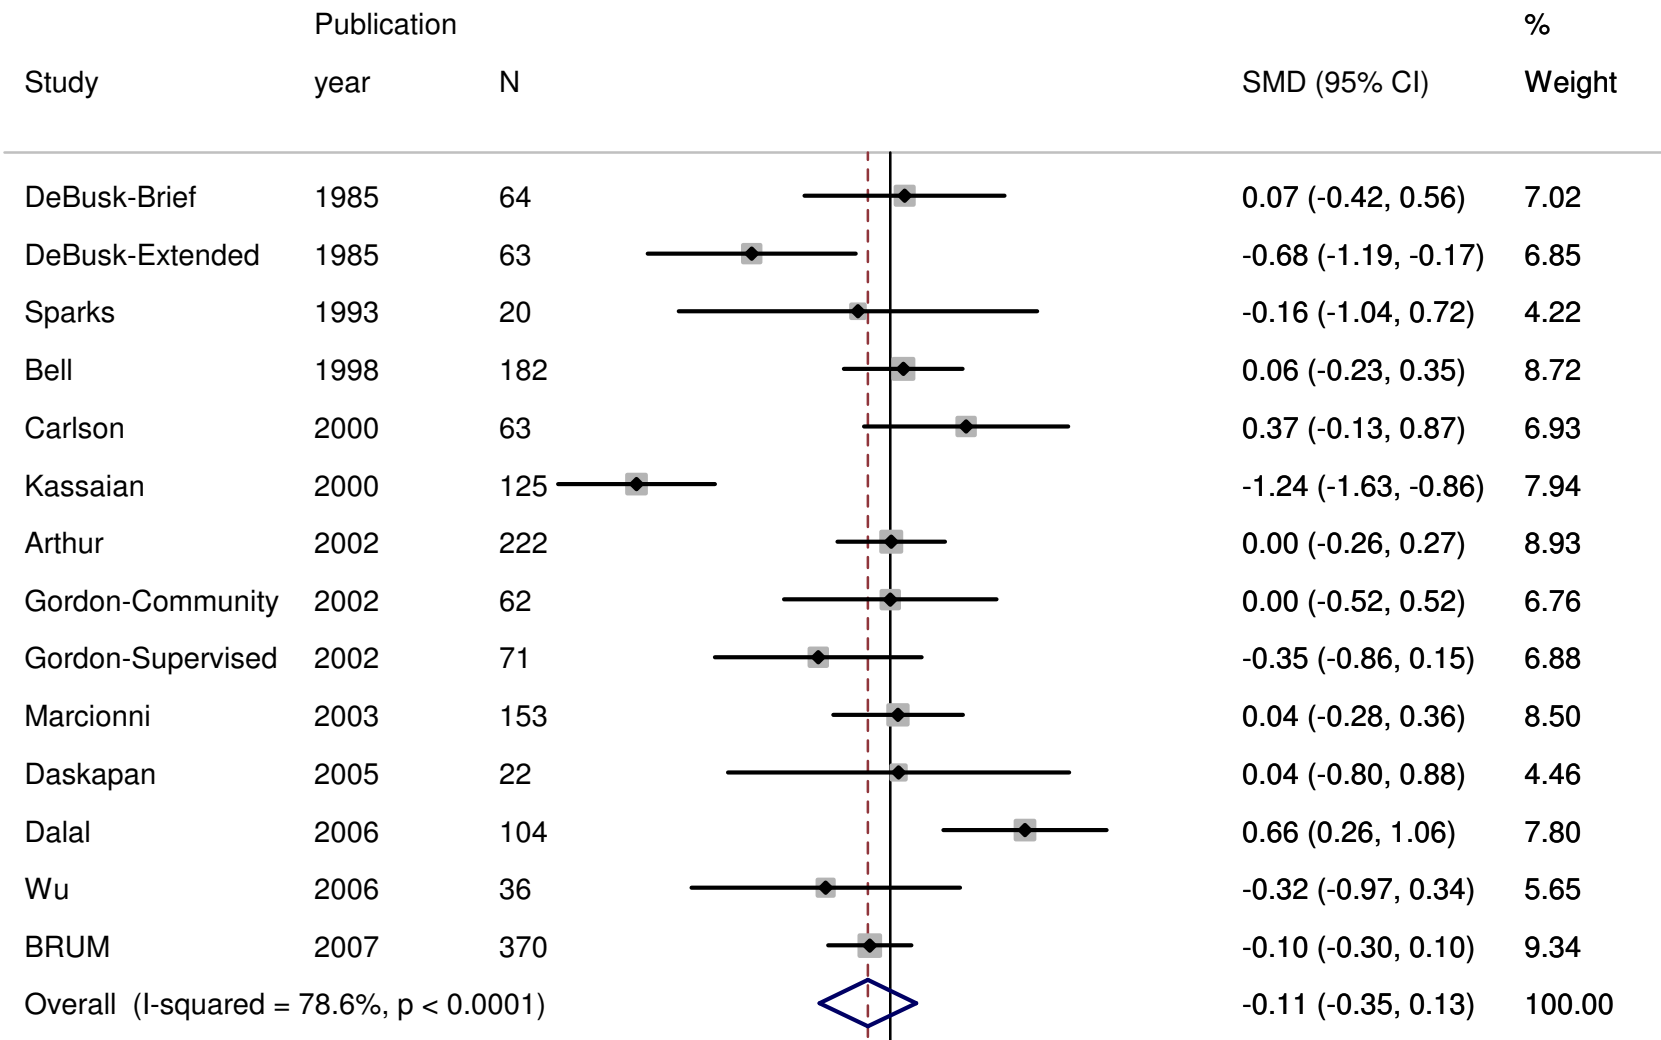

NOTE: Weights are from random effects analysis

-1.5 -1 -0.5 0 0.5 1 1.5  
 Favours Hospital CR Favours Home CR

Supplement: MOESM3 [file 9618872]
